# Supplementary material
Source: PubMed Central journal article supplement (PMC3465578)
Supplement: NIHMS49791-supplement-1.pdf [file NIHMS49791-supplement-1.pdf]

## Supplementary Information

### **Structural Basis of Fibrillar Collagen Trimerization and Related Genetic Disorders**

Jean-Marie Bourhis<sup>1,2</sup>, Natacha Mariano<sup>1</sup>, Yuguang Zhao<sup>3</sup>, Karl Harlos<sup>3</sup>, Jean-Yves Exposito<sup>1</sup>, E.Yvonne Jones<sup>3</sup>, Catherine Moali<sup>1</sup>, Nushin Aghajari<sup>4</sup>, David J.S. Hulmes<sup>1</sup>

<sup>1</sup>Formation de Recherche en Evolution 3310, Institut de Biologie et Chimie des Protéines, Centre National de la Recherche Scientifique, Université Lyon 1, 69367 Lyon cedex 7, France; <sup>2</sup>Unit for Virus Host Cell Interactions, Unité Mixte Internationale 3265, Centre National de la Recherche Scientifique, Université Joseph Fourier, European Molecular Biology Laboratory, 38042 Grenoble cedex 9, France; <sup>3</sup>Division of Structural Biology, Wellcome Trust Centre for Human Genetics, University of Oxford, Oxford OX3 7BN, UK; <sup>4</sup>Unité Mixte de Recherche 5086, Institut de Biologie et Chimie des Protéines, Centre National de la Recherche Scientifique, Université Lyon 1, 69367 Lyon cedex 7, France.

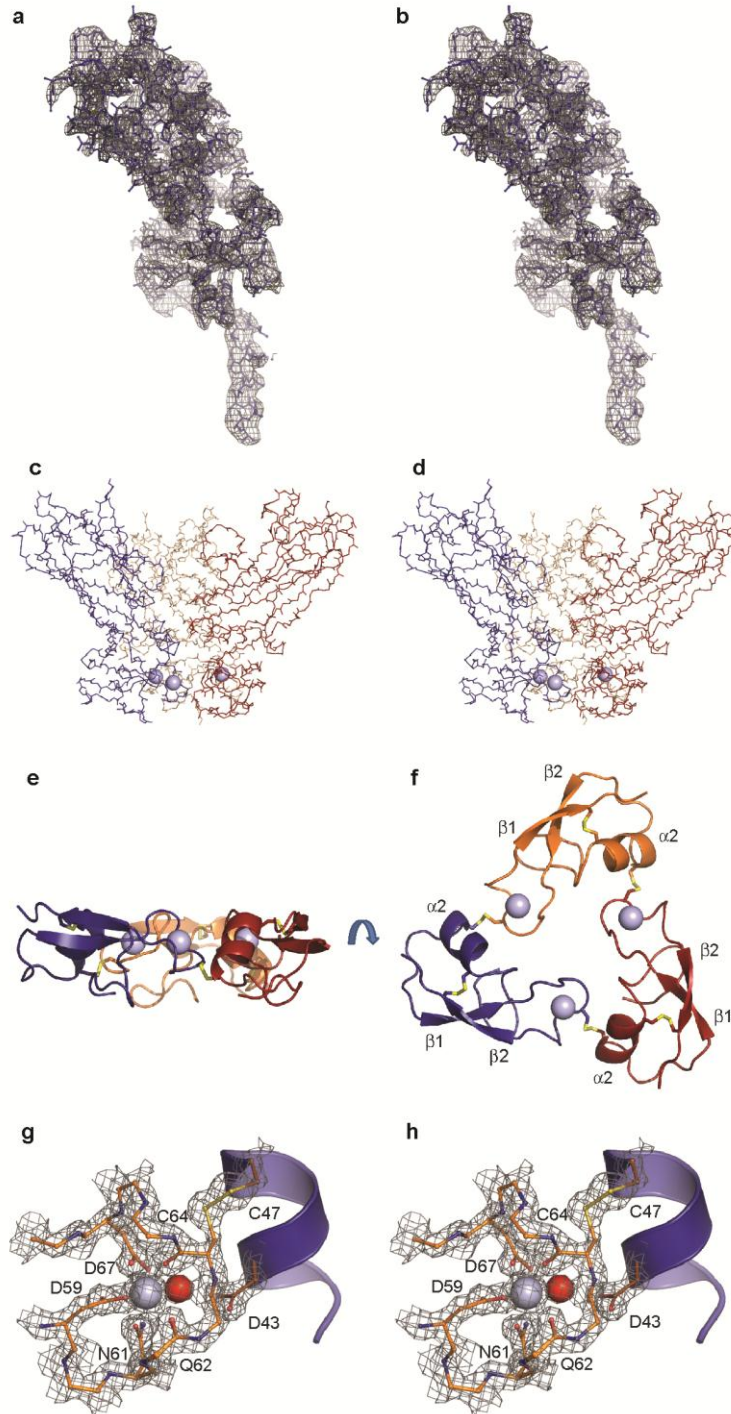

**Supplementary Figure 1.** Structural features of the human procollagen III C-propeptide trimer. **(a,b)** Stereo view of chain A from the 3.5 Å structure (form III) in the corresponding 2Fo-Fc electron density map contoured at  $1.5\sigma$ . **(c,d)** Stereo view of the 1.7 Å structure (form II; backbone trace) showing the three polypeptide chains as well as bound  $\text{Ca}^{2+}$  ions (light blue). Side **(e)** and top **(f)** views of the base region (form II; residues 30-76; Fig. 1b) showing bound  $\text{Ca}^{2+}$  ions, intra- and inter-chain disulfide bonds (yellow) and secondary structural elements. **(g,h)** Stereo view of the  $\text{Ca}^{2+}$  binding site (form II) in the 2Fo-Fc electron density map contoured at  $1.5\sigma$ . Octahedral coordination involves Asp59, Asn61, Gln62, Cys64 and Asp67 in one chain as well as a water molecule (red) hydrogen bonded to Asp43 in a neighboring chain. Also shown is the inter-chain disulfide bond involving Cys47 and Cys64. All structures drawn using PyMOL, Version 1.4.1, Schrödinger, LLC.

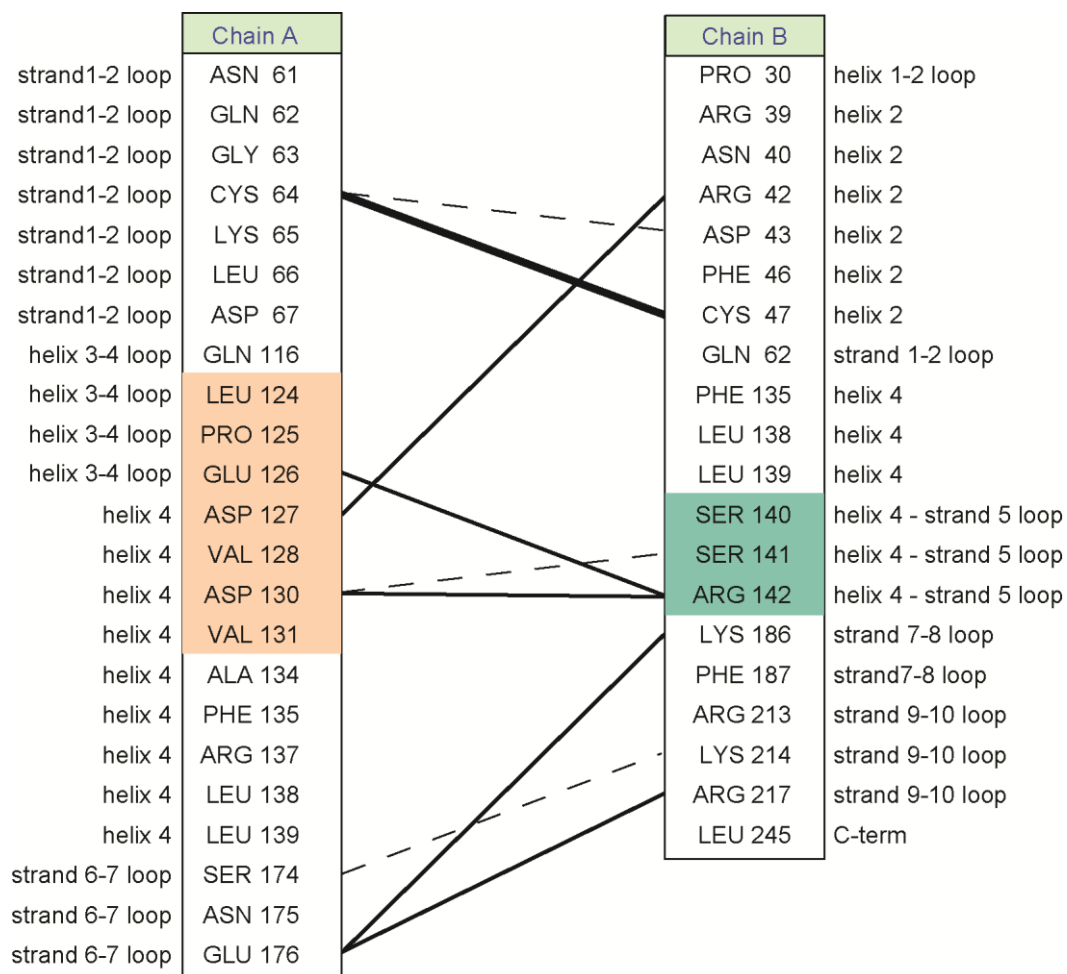

**Supplementary Figure 2.** Residues involved in stabilizing the interface between adjacent chains in the procollagen III C-propeptide trimer (excluding the stalk region). The inter-chain disulfide bond is indicated by the thick line, salt bridges by thin lines and hydrogen bonds by dotted lines. The remainder are interfacing residues. Corresponding secondary structure elements are also indicated. Residues in the chain recognition sequence are highlighted in wheat color (long stretch) and deep teal (short stretch). Interactions calculated using the PDBePISA<sup>44</sup> server at the European Bioinformatics Institute ([http://www.ebi.ac.uk/pdbe/prot\\_int/pistart.html](http://www.ebi.ac.uk/pdbe/prot_int/pistart.html)).

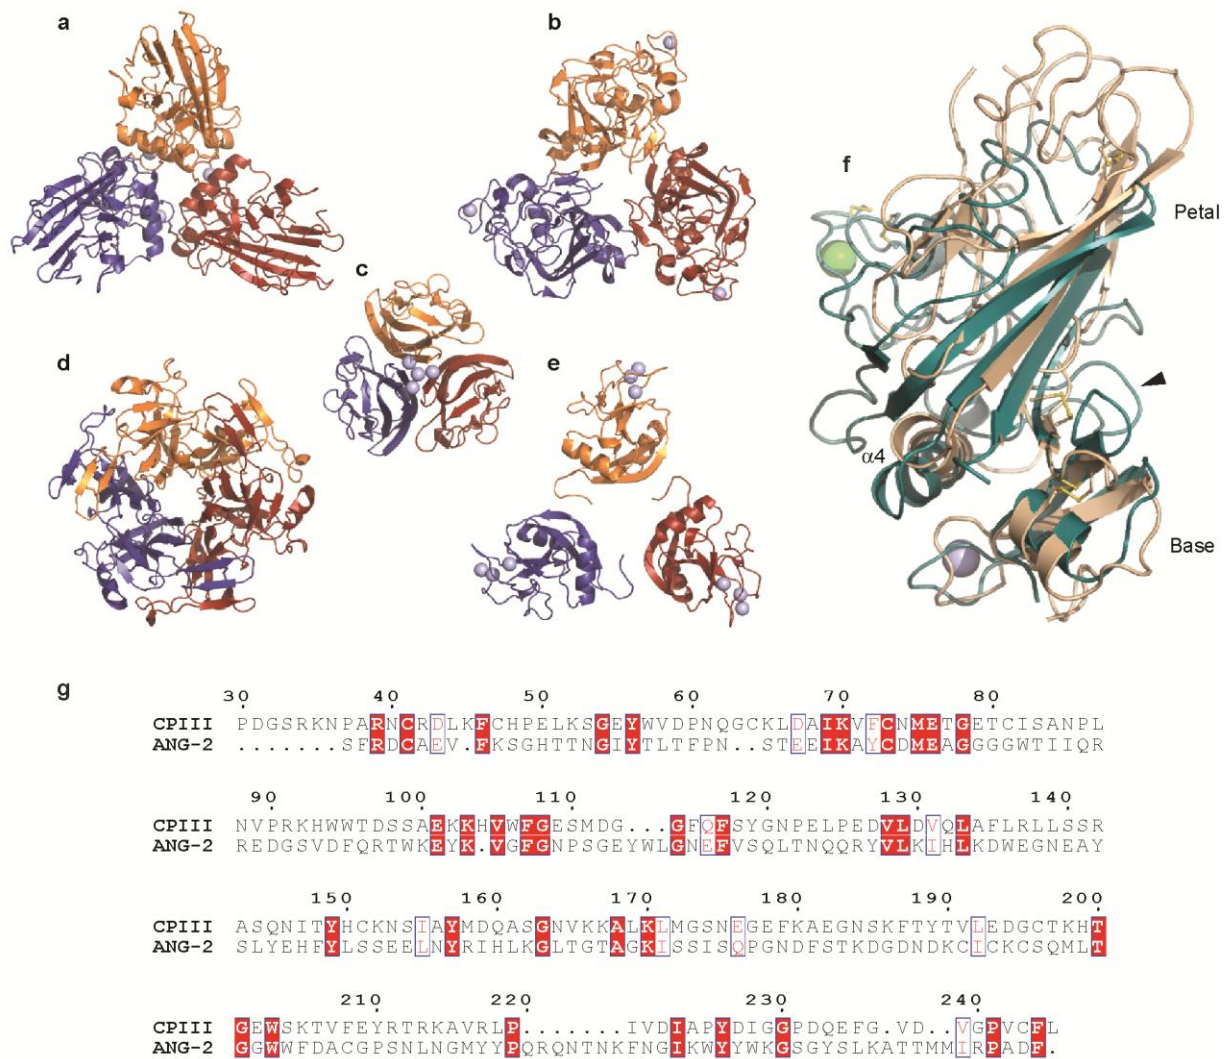

**Supplementary Figure 3.** Globular domains in fibrous protein trimerization and structural similarity with angiotensin-2. **(a-e)** Different types of globular domain including **(a)** fibrillar procollagen C-propeptides (procollagen III; buried surface area ~ 3800 Å<sup>2</sup>), **(b)** fibrinogen domains (L-ficolin<sup>45</sup>; PDB code 2J3G; buried surface area ~ 2900 Å<sup>2</sup>) **(c)** C1q family<sup>46</sup> (collagen X NC1 trimer<sup>47</sup>; PDB code 1GR3; buried surface area ~ 5600 Å<sup>2</sup>) **(d)** collagen IV NC1 region<sup>48,49</sup> (PDB code 1LI1; buried surface area ~ 13400 Å<sup>2</sup>) and **(e)** collectins<sup>50,51</sup> (mannan binding lectin; PDB code P3OB; buried surface area ~ 900 Å<sup>2</sup>). In all cases, views are from the C-terminal end of the molecule looking down the principal axis, with only the globular regions shown (i.e. omitting underlying collagen-like or α-helical coiled-coil regions). Bound Ca<sup>2+</sup> ions are shown in light blue. Among these structures, only the procollagen C-propeptide trimer is stabilized by inter-chain disulfide bonds. Buried surface areas calculated using the PDBePISA<sup>44</sup> server at the European Bioinformatics Institute ([http://www.ebi.ac.uk/pdbe/prot\\_int/pistart.html](http://www.ebi.ac.uk/pdbe/prot_int/pistart.html)). **(f)** Structural alignment of chain A of the proα1(III) C-propeptide trimer (1.7Å structure; wheat color; Ca<sup>2+</sup> ion in light blue) with the receptor binding domain of angiotensin-2<sup>52</sup> (PDB code 1Z3S; deep teal color; Ca<sup>2+</sup> ion in green), obtained using DALI<sup>23</sup>. Note that the equivalent of helix 4 in the C-propeptide structure is interrupted by a large loop (arrowhead) in angiotensin-2. Structural similarity in the base region includes a conserved intra-chain disulfide bond. **(g)** Sequence alignment of the C-propeptide of human procollagen III (CPIII) with the receptor binding region of angiotensin-2 (ANG-2). Sequence identity is less than 15 %. Sequence alignment and rendering done using CLUSTALW<sup>34</sup> and ESPript<sup>35</sup>, respectively. All structures drawn using PyMOL, Version 1.4.1, Schrödinger, LLC.





**Supplementary Table 1.** Positions and consequences of known missense mutations in the C-propeptides of the pro $\alpha$ 1(I), pro $\alpha$ 2(I), pro $\alpha$ 1(II), pro $\alpha$ 1(III) and pro $\alpha$ 1(V) chains. Numbering starts from the methionine at the translation initiation site, with corresponding positions in the procollagen III C-propeptide (CPIII) numbered from the BMP-1 cleavage site. Note that the disorders caused by the PLSD-T/SPD mutations in the pro $\alpha$ 1(II) chain are specific to the C-propeptide region<sup>28</sup>.

| Gene   | Mutation and position | CPIII equivalent | Phenotype               | Ref                 | Region | Probable consequence              |
|--------|-----------------------|------------------|-------------------------|---------------------|--------|-----------------------------------|
| COL1A1 | Asp1219Glu            | 1 (Asp)          | OI type I (mild)        | <sup>54</sup>       | stalk  | prevents BMP-1 cleavage           |
| COL1A1 | Asp1219Asn            | 1 (Asp)          | OI type I (mild)        | <sup>16</sup>       | stalk  | prevents BMP-1 cleavage           |
| COL1A1 | Ala1256Thr            | 38 (Ala)         | OI type I (mild)        | <sup>55</sup>       | base   | destabilizes base                 |
| COL1A1 | Leu1262Arg            | 44 (Leu)         | OI type II (lethal)     | <sup>a</sup>        | base   | disrupts S-S bond                 |
| COL1A1 | Asp1277His            | 59 (Asp)         | OI type II (lethal)     | <sup>31</sup>       | base   | disrupts Ca <sup>2+</sup> binding |
| COL1A1 | Asp1277Glu            | 59 (Asp)         | OI type II (lethal)     | <sup>56</sup>       | base   | disrupts Ca <sup>2+</sup> binding |
| COL1A1 | Cys1299Trp            | 81 (Cys)         | OI type I (mild)        | <sup>25</sup>       | petal  | disrupts S-S bond                 |
| COL1A1 | Trp1312Cys            | 94 (Trp)         | OI type II (lethal)     | <sup>29</sup>       | petal  | disrupts S-S bond                 |
| COL1A1 | His1323Tyr            | 104 (His)        | OI type I (mild)        | <sup>57</sup>       | petal  | disrupts surface interactions     |
| COL1A1 | Gly1340Ser            | 121 (Asn)        | OI type I (mild)        | <sup>a</sup>        | petal  | disrupts CRS                      |
| COL1A1 | Arg1356His            | 137 (Arg)        | OI type II/III (lethal) | <sup>a</sup>        | petal  | disrupts inter-chain interactions |
| COL1A1 | Glu1361Lys            | 142 (Arg)        | OI type IV (moderate)   | <sup>a</sup>        | petal  | disrupts CRS                      |
| COL1A1 | Ala1387Val            | 168 (Ala)        | OI type IIC (lethal)    | <sup>58</sup>       | petal  | disrupts packing                  |
| COL1A1 | Leu1388Arg            | 169 (Leu)        | OI type II (lethal)     | <sup>31</sup>       | petal  | disrupts hydrophobic core         |
| COL1A1 | Asn1394Ser            | 175 (Asn)        | OI type I (mild)        | <sup>a</sup>        | petal  | disrupts inter-chain interactions |
| COL1A1 | Asp1413Asn            | 194 (Asp)        | OI type II (lethal)     | <sup>54,56,59</sup> | petal  | disrupts S-S bond                 |
| COL1A1 | Leu1437Gln            | 218 (Leu)        | OI type II (lethal)     | <sup>60</sup>       | petal  | disrupts hydrophobic core         |
| COL1A1 | Asp1441His            | 222 (Asp)        | OI type I (mild)        | <sup>61</sup>       | petal  | disrupts surface interactions     |
| COL1A1 | Asp1441Tyr            | 222 (Asp)        | OI type II (lethal)     | <sup>62</sup>       | petal  | disrupts surface interactions     |
| COL1A1 | Gly1448Asp            | 229 (Gly)        | OI type I/IV (moderate) | <sup>a</sup>        | petal  | disrupts surface interactions     |
| COL1A1 | Leu1464Pro            | 245 (Leu)        | OI type III (severe)    | <sup>27</sup>       | petal  | disrupts S-S bond                 |
| COL1A2 | Asp1120Ala            | 1 (Asp)          | OI type I (mild)        | <sup>a</sup>        | stalk  | prevents BMP-1 cleavage           |
| COL1A2 | Thr1148Pro            | 26 (Ser)         | OI type III (severe)    | <sup>27</sup>       | stalk  | disrupts coiled coil              |
| COL1A2 | Cys1163Arg            | 41 (Cys)         | OI type IV (moderate)   | <sup>63</sup>       | base   | disrupts S-S bond                 |
| COL1A2 | Asp1165Glu            | 43 (Asp)         | OI type I (mild)        | <sup>a</sup>        | base   | disrupts Ca <sup>2+</sup> binding |
| COL1A2 | Gly1176Val            | 54 (Gly)         | OI type IV (moderate)   | <sup>63</sup>       | base   | disrupts surface interactions     |
| COL1A2 | Cys1195Tyr            | 73 (Cys)         | OI type I (mild)        | <sup>54</sup>       | base   | disrupts S-S bond                 |
| COL1A2 | Asn1262Ser            | 141 (Ser)        | OI type I (mild)        | <sup>a</sup>        | petal  | disrupts CRS                      |
| COL1A2 | Asp1315Val            | 194 (Asp)        | OI type IV (moderate)   | <sup>63</sup>       | petal  | disrupts surface interactions     |
| COL1A2 | Gly1350Ser            | 229 (Gly)        | OI type I (mild)        | <sup>a</sup>        | petal  | disrupts surface interactions     |
| COL1A2 | Phe1365Leu            | 244 (Phe)        | OI type I (mild)        | <sup>55</sup>       | petal  | disrupts S-S bond                 |
| COL2A1 | Tyr1298Asn            | 56 (Tyr)         | SED (moderate)          | <sup>64</sup>       | base   | destabilizes base                 |

|        |            |           |                                                                     |                  |       |                                        |
|--------|------------|-----------|---------------------------------------------------------------------|------------------|-------|----------------------------------------|
| COL2A1 | Gly1305Ala | 63 (Gly)  | VEPD (moderate)                                                     | <sup>65</sup>    | base  | disrupts Ca <sup>2+</sup> binding loop |
| COL2A1 | Thr1383Met | 141 (Ser) | ANFH (mild)                                                         | <sup>66</sup>    | petal | disrupts CRS                           |
| COL2A1 | Thr1390Asn | 148 (Thr) | ACGII-HCG (PLSD-T) (lethal)                                         | <sup>28,67</sup> | petal | disrupts S-S bond                      |
| COL2A1 | Tyr1391Cys | 149 (Tyr) | PLSD-T/SPD (lethal/severe)                                          | <sup>30,68</sup> | petal | disrupts S-S bond                      |
| COL2A1 | Thr1439Met | 197 (Thr) | SEDC/PSACH (severe ; double mutant COL2A1/COMP)                     | <sup>69</sup>    | petal | disrupts S-S bond                      |
| COL2A1 | Thr1448Pro | 206 (Thr) | PLSD-T (lethal)                                                     | <sup>28</sup>    | petal | disrupts secondary structure           |
| COL2A1 | Ile1450Thr | 208 (Phe) | SEDC-M-like (mild)                                                  | <sup>64</sup>    | petal | disrupts hydrophobic core              |
| COL2A1 | Ile1450Asn | 208 (Phe) | SEDC-M-like (mild)                                                  | <sup>64</sup>    | petal | disrupts hydrophobic core              |
| COL2A1 | Asp1469His | 227 (Asp) | PLSD-T (moderate)                                                   | <sup>28</sup>    | petal | disrupts surface interactions          |
| COL2A1 | Cys1485Gly | 243 (Cys) | PLSD-T (lethal/severe; mother and child)                            | <sup>28</sup>    | petal | disrupts S-S bond                      |
| COL3A1 | Pro1258Ser | 37 (Pro)  | EDS type IV (vascular form, mild)                                   | <sup>b</sup>     | base  | disrupts secondary structure           |
| COL3A1 | Lys1273Arg | 52 (Lys)  | EDS type IV (vascular form, mild)                                   | <sup>b</sup>     | base  | disrupts surface interactions          |
| COL3A1 | Lys1313Arg | 92 (Lys)  | EDS type IV/TSAH (vascular form, lethal following traumatic injury) | <sup>70</sup>    | petal | disrupts surface interactions          |
| COL5A1 | Cys1639Ser | 41 (Cys)  | EDS type I (hyperextensible skin, joint laxity)                     | <sup>32</sup>    | base  | disrupts S-S bond                      |

<sup>a</sup> Unpublished, see <https://oi.gene.le.ac.uk>

<sup>b</sup> Personal communication (X. Jeunemaitre, Paris Cardiovascular Research Centre, INSERM U970, Paris, France).

Other sources : <https://eds.gene.le.ac.uk>, <http://bioinf.umbc.edu/dmdm>

Abbreviations: ACGII-HCG = achondrogenesis type II – hypochondrogenesis; ANFH = avascular necrosis of the femoral head; COMP = cartilage oligomeric matrix protein; CPIII = C-propeptide of procollagen III; EDS = Ehlers-Danlos syndrome; CRS = chain recognition sequence; OI = osteogenesis imperfecta; PSACH = pseudoachondroplasia; PLSD-T = platyspondylic lethal skeletal dysplasia Torrance type (N.B. despite its name, this syndrome is not always lethal); PSACH = pseudoachondrodysplasia; SEDC = spondyloepiphyseal dysplasia congenita; SEDC-M = spondyloepiphyseal dysplasia congenita mild; SEDT = spondyloepiphyseal dysplasia tarda; SPD = spondyloperipheral dysplasia; TSAH = traumatic sub-arachnoid haemorrhage; VPED = vitreoretinopathy and phalangeal epiphyseal dysplasia.

44. Krissinel,E. & Henrick,K. Inference of macromolecular assemblies from crystalline state. *J. Mol. Biol* **372**, 774-797 (2007).
45. Garlatti,V. *et al.* Structural insights into the innate immune recognition specificities of L- and H-ficolins. *EMBO J.* **26**, 623-633 (2007).
46. Gaboriaud,C. *et al.* The crystal structure of the globular head of complement protein C1q provides a basis for its versatile recognition properties. *J. Biol. Chem.* **278**, 46974-46982 (2003).
47. Bogin,O. *et al.* Insight into Schmid metaphyseal chondrodysplasia from the crystal structure of the collagen X NC1 domain trimer. *Struct. Fold. Des.* **10**, 165-173 (2002).
48. Than,M.E. *et al.* The 1.9-Å crystal structure of the noncollagenous (NC1) domain of human placenta collagen IV shows stabilization via a novel type of covalent Met-Lys cross-link. *Proc. Nat. Acad. Sci. USA* **99**, 6607-6612 (2002).
49. Sundaramoorthy,M., Meiyappan,M., Todd,P., & Hudson,B.G. Crystal structure of NC1 domains: Structural basis for type IV collagen assembly in basement membranes. *J. Biol. Chem.* **277**, 31142-31153 (2002).
50. Sheriff,S., Chang,C.Y., & Ezekowitz,R.A. Human mannose-binding protein carbohydrate recognition domain trimerizes through a triple alpha-helical coiled-coil. *Nat. Struct. Biol.* **1**, 789-794 (1994).
51. Weis,W.I. & Drickamer,K. Trimeric structure of a C-type mannose-binding protein. *Structure.* **2**, 1227-1240 (1994).
52. Barton,W.A., Tzvetkova,D., & Nikolov,D.B. Structure of the angiopoietin-2 receptor binding domain and identification of surfaces involved in Tie2 recognition. *Structure.* **13**, 825-832 (2005).
53. Buchan,D.W. *et al.* Protein annotation and modelling servers at University College London. *Nucleic Acids Res.* **38**, W563-W568 (2010).
54. Pollitt,R. *et al.* Mutation analysis of COL1A1 and COL1A2 in patients diagnosed with osteogenesis imperfecta type I-IV. *Hum. Mutat.* **27**, 716 (2006).
55. Zhang,Z.L. *et al.* The identification of novel mutations in COL1A1, COL1A2 and LEPRE1 genes in Chinese patients with osteogenesis imperfecta. *J. Bone Miner. Metab.* **30**, 69-77 (2012).
56. Pyott,S.M. *et al.* Recurrence of perinatal lethal osteogenesis imperfecta in sibships: parsing the risk between parental mosaicism for dominant mutations and autosomal recessive inheritance. *Genet. Med.* **13**, 125-130 (2011).
57. Ries-Levavi,L. *et al.* Genetic and biochemical analyses of Israeli osteogenesis imperfecta patients. *Hum. Mutat.* **23**, 399-400 (2004).
58. Takagi,M. *et al.* Heterozygous C-propeptide mutations in COL1A1: osteogenesis imperfecta type IIC and dense bone variant. *Am. J. Med. Genet. A* **155A**, 2269-2273 (2011).
59. Bodian,D.L. *et al.* Mutation and polymorphism spectrum in osteogenesis imperfecta type II: implications for genotype-phenotype relationships. *Hum. Mol. Genet.* **18**, 463-471 (2009).
60. Rugolotto,S. *et al.* Pulmonary function tests in an infant with osteogenesis imperfecta and early bisphosphonate treatment. *Acta Paediatrica* **96**, 1855-1862 (2007).
61. Ke,L.F. *et al.* Molecular diagnosis of a Chinese pedigree with osteogenesis imperfecta type I. *Zhonghua Yi Xue Yi Chuan Xue Za Zhi* **26**, 50-53 (2009).
62. Pace,J.M. *et al.* A single amino acid substitution (D1441Y) in the carboxyl-terminal propeptide of the proalpha1(I) chain of type I collagen results in a lethal variant of osteogenesis imperfecta with features of dense bone diseases. *J. Med. Genet.* **39**, 23-29 (2002).
63. Pace,J.M. *et al.* Defective C-propeptides of the proalpha2(I) chain of type I procollagen impede molecular assembly and result in osteogenesis imperfecta. *J. Biol. Chem.* **283**, 16061-16067 (2008).
64. Nishimura,G. *et al.* The phenotypic spectrum of COL2A1 mutations. *Hum. Mutat.* **26**, 36-43 (2005).
65. Richards,A.J. *et al.* Vitreoretinopathy with phalangeal epiphyseal dysplasia, a type II collagenopathy resulting from a novel mutation in the C-propeptide region of the molecule. *J. Med. Genet.* **39**, 661-665 (2002).
66. Kannu,P., O'Rielly,D.D., Hyland,J.C., & Kokko,L.A. Avascular necrosis of the femoral head due to a novel C propeptide mutation in COL2A1. *Am. J. Med. Genet. A* **155A**, 1759-1762 (2011).
67. Mortier,G.R. *et al.* Report of five novel and one recurrent COL2A1 mutations with analysis of genotype-phenotype correlation in patients with a lethal type II collagen disorder. *J. Med. Genet.* **37**, 263-271 (2000).
68. Hoornaert,K.P. *et al.* Czech dysplasia metatarsal type: another type II collagen disorder. *Eur. J. Hum. Genet.* **15**, 1269-1275 (2007).
69. Unger,S. *et al.* Double heterozygosity for pseudoachondroplasia and spondyloepiphyseal dysplasia congenita. *Am. J. Med. Genet.* **104**, 140-146 (2001).
70. Pickup,M.J. & Pollanen,M.S. Traumatic subarachnoid hemorrhage and the COL3A1 gene: emergence of a potential causal link. *Forensic Sci. Med. Pathol.* **7**, 192-197 (2011).
